1 **Patient involvement in the biopsychosocial model of care**  
2 **integrated with primary health services: Experience from**  
3 **three health districts in South Kivu, Democratic Republic of**  
4 **Congo.**

5 Bertin Mutabesha Kasongo<sup>1,2\*</sup>, Christian Eboma Ndjangulu Molima<sup>1</sup>, Gérard Jacques  
6 Mparanyi<sup>3</sup>, Samuel Lwamushi Makali<sup>1,4</sup>, Pacifique Lyabayungu Mwene-Batu<sup>1</sup>, Albert Mwembo  
7 Tambwe<sup>2</sup>, Hermès Karemere<sup>1,3</sup>, Ghislain Balaluka Bisimwa<sup>1,5,6</sup>, Abdon Mukalay wa Mukalay<sup>2</sup>

8 <sup>1</sup>Ecole Régionale de Santé Publique (ERSP), Catholic University of Bukavu, Bukavu, Democratic  
9 Republic of Congo

10 <sup>2</sup>School of Public Health (ESP), University of Lubumbashi, Lubumbashi, Democratic Republic of  
11 Congo

12 <sup>3</sup>Faculty of Pharmaceutical Sciences and Public Health, Official University of Bukavu, Bukavu,  
13 Democratic Republic of Congo

14 <sup>4</sup>Centre de recherche sur les politiques et systèmes de santé (CR3-POLISSI), Ecole de santé  
15 publique, Université libre de Bruxelles, Brussels, Belgium

16 <sup>5</sup>Centre de Recherche en Sciences Naturelles, Lwiro, Democratic Republic of Congo

17 <sup>6</sup>Université du Cinquantenaire, Lwiro, Democratic Republic of Congo

18 \* **Corresponding author:** [bkas2504@gmail.com](mailto:bkas2504@gmail.com) (BMK)

19

20

21

22

23

24

25

26

NOTE: This preprint reports new research that has not been certified by peer review and should not be used to guide clinical practice.

## 27 **Abstract**

28 **Introduction:** Involving people in the provision of care and in decision-making about their  
29 health is one of the keys to success and to improving service delivery in the provision of quality  
30 health care. Patient involvement in the biopsychosocial model of care is poorly documented  
31 in the Democratic Republic of Congo (DRC). The aim of this study is to describe patients'  
32 involvement in the choice of their health policy, their responsibility in holistic care and their  
33 capacity to support the biopsychosocial model.

34 **Methods:** This qualitative research was conducted in three health districts in the province of  
35 South Kivu, DRC. Using a tool inspired by the International Alliance of Patients' Organizations'  
36 Declaration of Patient-Centered Healthcare, we conducted 27 individual interviews between  
37 February and April 2024. These interviews concerned people in complex situations, attending  
38 health centers and belonging to patient clubs in six health areas covered by the study. A  
39 content analysis of the discourse from the various interviews was carried out.

40 **Results:** Patient involvement in the biopsychosocial model of care depended on multiple  
41 factors, including relational aspects (partnership between providers and patients, discussion  
42 of therapeutic possibilities and guidance for choice), educational aspects (advice and teaching  
43 received from caregivers, development of skills), empowerment (responsibility for care),  
44 organizational aspects (inclusive and participatory planning, access to different health  
45 services) and community aspects (role of entourage and patient clubs).

46 **Conclusions:** The various factors influencing patient involvement in the BPS model should be  
47 taken into account in the definition of policies and the process of integrating biopsychosocial  
48 care. Some of the strategies suggested to support the model, such as raising awareness of the  
49 humanization of care, improving the availability of resources and strengthening financial  
50 autonomy, will help to improve the quality of care and accessibility to quality health services.

51 **Keywords:** patient, involvement, health policy, biopsychosocial model, health district, DRC

52

53

54

55

## 56 Introduction

57 Involving people in the provision of care and in decision-making about their health is one of  
58 the keys to success and to improving service delivery in the provision of quality health care.  
59 (1,2). Involving people in their own care means allowing them to participate autonomously in  
60 defining the health care policies that concern them, taking into account their needs,  
61 preferences and independence (3–5).

62 Various strategies and models for explaining people's involvement in care have been provided  
63 worldwide. These include health policy development, participation in decision-making about  
64 their health, co-production of health services, quality improvement and restructuring of  
65 health systems... (6–8).

66 Some studies have revealed that patients who are involved in the provision of care express a  
67 sense of well-being and self-satisfaction (9). Others have reported improved interaction and  
68 communication between providers and patients (10), patient adherence to treatment (11),  
69 and consideration of patients as partners in care(12).

70 In the context of low-income countries, particularly in Sub-Saharan Africa, the participation  
71 and involvement of patients in decision-making about their care is crucial. The aim is to  
72 improve both their health and the health systems, which are still fragile. In some situations,  
73 this involvement is limited to service design and health research (13), or patients' ignorance  
74 of their right to participate in the decision-making process in their care, especially the less  
75 educated (14). Other experiences are either conclusive in terms of positive results in the  
76 provision of person-centered care (PCC), as in the treatment of HIV (15). Some provide  
77 strategies for involving patients in their own care and thus facilitating the achievement of  
78 these positive outcomes, particularly in mental health (16), where the biopsychosocial (BPS)  
79 model of care would also require taking spiritual aspects into account (17). Involving patients  
80 in their care also requires empowerment, as shown by these studies analyzing the barriers  
81 and facilitators to patient empowerment in controlling their disease (18,19).

82 In the Democratic Republic of Congo (DRC), particularly in the Eastern region where the health  
83 system is faced with complex situations and crises, involving patients in their biopsychosocial  
84 care is crucial to the system in order to strengthen collaboration between providers and

85 patients, offering them care adapted to their needs, according to biological, psychological and  
86 socio-cultural dimensions, and thus improving the quality of health care.

87 Various studies have been carried out into patient involvement in decision-making about their  
88 health and care services for certain health situations (20,21), their perceptions and also their  
89 satisfaction with the holistic care on offer (22,23). However, to our knowledge, patient  
90 involvement in the BPS model of care is poorly documented in the DRC.

91 The aim of this study is to describe patients' involvement in choosing their health policy, their  
92 responsibility for holistic care and their ability to support this BPS model.

93

94

95

96

97

98

99

100

101

102

103

104

105

## 106 Methods

### 107 Study settings:

#### 108 Organizational framework of the health system in the DRC (operational level):

109 The present study was carried out in South Kivu Province, DRC, more specifically in three  
110 Health Zones (HZ) or Health Districts (HD).

111 The DRC's healthcare system is divided into three levels: the central or national level, the  
112 intermediate or provincial level, and the peripheral or operational level. Our study takes place  
113 at the operational level, made up of HDs.

114 This level is responsible for implementing Primary Health Care (PHC) strategies. It comprises  
115 the HDs (mostly with a General Reference Hospital each), which are subdivided into Health  
116 Areas (HA), each with a Health Center (HC). The health districts operate under the  
117 coordination of the Health Zone Management Team. This coordination involves the planning,  
118 implementation, monitoring and evaluation of all HD activities, operationalized at HA level, by  
119 the HC team (HC Head Nurse and other care providers). The Health Center is the point of  
120 contact between the health system and the population, through community participation  
121 structures, direct community representatives (Health Area Development Committee or  
122 CODESA, which is one of the HC's co-management structures, Community Animation Cell –  
123 CAC; Community Health Workers – CHWs) and other structures known as “community-based  
124 organizations” (organisations à assises communautaires - OAC) (24,25).

#### 125 Geographical and health context of the HDs:

126 The three HDs concerned by our study have been receiving support from Louvain Coopération  
127 as part of the Non-Communicable Diseases Program (PMNT) since 2022. This project focuses  
128 on the management of diabetes, hypertension and mental health, as a gateway to BPS care.

129 Table 1 gives some health information for these three HDs.

130 Table 1. Description of health districts

| Health District | Population (inhabitants) | HA/HC Number | Hospital | Rates of utilization of curative services (%)* |
|-----------------|--------------------------|--------------|----------|------------------------------------------------|
| Bagira          | 162186                   | 8            | 3        | 32.8                                           |
| Katana          | 267504                   | 20           | 4        | 72.1                                           |
| Walungu         | 318610                   | 23           | 3        | 32.5                                           |

131 *Source: health pyramid of South Kivu HD and DHIS2, 2023*

132 \* The health standard for the rate of utilization of curative services is  $\geq 50\%$

133 This program covers four HA in each of these three HD. For the purposes of this study, six of  
134 the twelve HAs benefiting from this support were selected on the basis of reasoned choice  
135 and accessibility, with 2 HAs per HD (Lumu and Nyamuhinga HAs in the Bagira HD, Birava and  
136 Kabushwa HAs in the Katana HD, and Bideka and Lurhala HAs in the Walungu HD).

### 137 **Study design and period:**

138 This was a cross-sectional study, using a descriptive qualitative approach (26,27), carried out  
139 during the period February to April 2024.

### 140 **Conceptual framework for community engagement in the BPS model of care**

141 This study is based on the conceptual framework of community involvement in the  
142 biopsychosocial model of care, which we have developed. Community involvement in care  
143 according to the BPS model requires interaction between the community and the healthcare  
144 system, represented by the provision of integrated services. We have developed the various  
145 components to be taken into account for the biopsychosocial perspective (availability of  
146 qualified health personnel, quality health services, social groups and the individual).

147 This framework is represented in Fig 1.

148 **Fig 1: Conceptual Framework for Community Engagement in the BPS Model (\*COMPART :**  
149 **Community Participation)**

150

151 In this sense, on the health system side, it will be necessary to act on the physical environment,  
152 in particular:

- 153 - The availability of qualified healthcare staff: on the front line of care, not only are the  
154 acts performed by staff complementary, but multidisciplinary should also be  
155 encouraged.
- 156 - Availability of quality healthcare services: quality care requires both qualified  
157 personnel and good quality healthcare services.

158 For the community, we need to act on the psychosocial and sociocultural environment, taking  
159 into account the individual and social or community groups:

- 160 - Individual: the person who is responsible for his or her own health. In this context,  
161 “empowerment” is defined as described in health promotion (28,29). A key element  
162 of the BPS model is the individual's participation in the provision of care. His recovery  
163 depends on his involvement or acceptance in the provision of care (2). Elements  
164 directly related to the individual are also taken into account, including biological and  
165 genetic characteristics, personal and social skills, lifestyle habits and behaviors, and  
166 socioeconomic characteristics.
- 167 - Social groups: here we have all the community groups and social networks, starting  
168 with the person's family and entourage, which are the primary social groups, with a  
169 major socio-cultural influence on health (30,31). Then there are the various  
170 associations and groups, including the diabetics' club, the club for people living with  
171 AIDS (considered to be community-based organizations - OAC), as well as community  
172 participation bodies such as CODESA, CACs..., all of which provide immediate support  
173 to the individual. These elements need to be taken into account in care, especially in  
174 psychosocial support, a key component of the BPS model of care (32,33).

175 In this study, we focus on the “individual” component (in green in Figure 1) and its interactions  
176 with the other components, in particular its involvement in the definition of policies related  
177 to decision-making in BPS care, the integrated service delivery component having been the  
178 subject of other studies elsewhere (34,35). The “social groups” component has been  
179 developed in another complementary work.

180 The conceptual model presented above is inspired by the theoretical frameworks of person-  
181 centered care proposed by De Man J et al.(36), Moreau A et al. (37) and Mead N & Bower P  
182 (38).

### 183 **Study participant selection**

184 A selection by convenience was made to include participants in the study. We took into  
185 account patients who belonged to clubs (diabetic and hypertensive clubs), considered to be  
186 patient support groups. We considered patients who had been members of these clubs for at  
187 least one year prior to the survey, and who were active in the activities organized by these

188 clubs. This was done in order to understand the dynamism around the BPS model and the  
189 interaction between the three components of our conceptual framework, namely the  
190 individual, the healthcare professional and social groups (specifically support groups). A total  
191 of 27 patients were selected for this study.

192 Table 1 shows their distribution in different HDs.

193 Table 1: **Persons interviewed on the basis of origin**

| Health District | Health Area | Persons interviewed |
|-----------------|-------------|---------------------|
| Bagira          | Lumu        | 4                   |
|                 | Nyamuhinga  | 5                   |
| Katana          | Birava      | 5                   |
|                 | Kabushwa    | 5                   |
| Walungu         | Bideka      | 5                   |
|                 | Lurhala     | 3                   |
| Total           |             | 27                  |

194

### 195 **Data collection:**

196 We conducted individual semi-structured interviews with selected patients. Some were met  
197 at the HC when they came for treatment, others were found in their households.

198 An interview guide based on the International Alliance of Patients' Organizations' Declaration  
199 of Patient-Centered Care (39) was used to collect data.

200 The interviews focused mainly on describing the relationship between patients and providers  
201 on the one hand, and between patients and the community on the other (mainly support  
202 groups); the respect for patients' needs, autonomy and independence by providers in offering  
203 care; patients' involvement in the choice of care policies in relation to their health and in  
204 decision-making; their share of responsibility in holistic care; their ability to support the  
205 approach; where possible, to propose solutions for maintaining this BPS care.

206 These interviews were conducted by two members of the research team, after obtaining the  
207 interviewees' consent and explaining the purpose of the study.

208 They were conducted in Swahili and/or the local language (Shi), with an interpreter facilitating  
209 translation, and lasted an average of 45 minutes. It should be noted that there was only one



210 interpreter for all these interviews, who spoke, understood and wrote the local language well.  
211 The interviews were recorded on an audio recorder, then transferred to a laptop for storage.

## 212 Data analysis

213 The recorded interviews were transcribed verbatim into Word files before being translated  
214 into French, using two independent translators to ensure the accuracy of the interviewees'  
215 words.

216 We then carried out a content analysis of these transcripts, using a combination of inductive  
217 and deductive approaches (40). We first familiarized ourselves with the interviews, which we  
218 read and reread, before identifying and coding the content that had been discussed and  
219 agreed upon. We then grouped them according to repetition and similarity, and associated  
220 them with categories deduced globally from the principles of the International Alliance of  
221 Patients' Organizations' Declaration of Patient-Centered Care, which we considered as sub-  
222 themes (41). Finally, we defined four main themes, by consensus, by grouping together the  
223 sub-themes retained, after team discussions: (1) Participation and Empowerment; (2)  
224 Involvement and Acceptance; (3) Psychosocial Skills and (4) Respect and Information. The  
225 following table (Table 2) provides an illustration of the data analysis process. Our data are  
226 presented according to these selected sub-themes and main themes, supported by a few  
227 verbatims. BKM, GJM and CENM participated in this data analysis. We have taken into account  
228 in this analysis the categories identified that were contradictory to those mainly retained.

229

230

231

232

233

234

235

236

237 Table 2: Illustration of the data analysis process

| Extracts from textual data                                                                                                                                                                     | Codes                                                | Sous-themes                         | Themes                      |
|------------------------------------------------------------------------------------------------------------------------------------------------------------------------------------------------|------------------------------------------------------|-------------------------------------|-----------------------------|
| "... it all depends on my behavior... it's myself who is called upon to inject insulin, after the caregiver's explanations..."                                                                 | Personal responsibility in care                      | Autonomy                            | Participation & Empowerment |
| "... We feel very much considered. They take us for their partners..."                                                                                                                         | Consideration and partnership                        |                                     |                             |
| "...I explain things clearly and help them adopt the treatment that suits them, based on the results of the tests..."                                                                          | Discussion of therapeutic options                    | Making choices                      |                             |
| "... But they give us clear explanations about the drugs they recommend, tell us why it's the best option, until we understand..."                                                             | Choice orientation                                   |                                     |                             |
| "... It's just a matter of becoming aware of and accepting the disease, telling ourselves that it's an illness like any other..."                                                              | Health awareness                                     | Involvement in health policy        | Involvement & Acceptance    |
| "... And in our meetings, the president shows us, for example, the tokens that head nurse gave him in the HC meeting, which will be used to send patients for treatment..."                    | Role of support groups in planning                   |                                     |                             |
| "... Respect for diet and meals, a bit of sport (walking), odd jobs that can help us get a bit of sweat..."                                                                                    | Prevention and promotion                             | Access and support                  |                             |
| "... There's a change, because with our social security fund, if someone gets sick and there's no medicine, we touch it and go buy elsewhere..."                                               | Club support                                         |                                     |                             |
| "... Sometimes he gives me tablets that I don't like, because I don't feel good with them, ... and I tell him, I don't want that ... stay with it, I'll go buy somewhere else..."              | Decide on your treatment                             | Cognitive skills                    | Psychosocial skills         |
| "... My tension rises because of harmful thoughts related to family problems, my children are delinquents..."                                                                                  | Identify the origin of a health problem              |                                     |                             |
| "... We talk in clubs among ourselves before the carers come for the teachings, and we ask questions, or they ask us questions to see if we've understood correctly..."                        | Interactive skills in support groups                 | Social skills                       |                             |
| "... We're asked to do the sport that makes us sweat a bit, and that will help us control ourselves, let off steam..."                                                                         | Regulating emotions                                  | Emotional skills                    |                             |
| "My children help me avoid stress, and if they're not around I distract myself with the radio and avoid noise and anything that might disturb me..."                                           | Managing stress                                      |                                     |                             |
| "... I can say yes and I feel free and satisfied..."                                                                                                                                           | Freedom and satisfaction in care                     | Adapting care to patients' needs    | Respect & Information       |
| "... They have time to listen to us and ... take our opinions into consideration ... in addition to medication, they also send us psychologists who give us advice on sticking to the diet..." | Taking advice and psychological support into account |                                     |                             |
| "... this information helps us to live better in society..."                                                                                                                                   | Living with illness                                  | Information sharing and perspective |                             |
| "... That they give IGAs that will improve the socio-economic standard of living of certain patients..."                                                                                       | Social support for financial independence            |                                     |                             |

238

239

## 240 Ethics statement

241 This research was approved by the Ethics Committee of the Catholic University of Bukavu  
242 (UCB) under the order number UCB/CIES/NC/002/2024. The study took care to comply with  
243 the following ethical principles, in line with the WMA Declaration of Helsinki. Prior to data  
244 collection, the researcher was careful to explain the reasons and objectives of the study. He  
245 then presented the interviewees with an informed consent form, which they were invited to  
246 read and sign before the interview began. All respondents voluntarily accepted and signed the  
247 written consent form, consented to participate in the study and the audio recording.  
248 Respondents were free to express themselves in any language they felt comfortable with  
249 (Swahili or Shi), with an interpreter to facilitate translation for interviews in the local language  
250 (Shi). Respondents were assured anonymity in order to respect their confidentiality.

## 251 Results

### 252 1. General characteristics of participants

253 Table 3 shows the general characteristics of the study participants. The majority of  
254 respondents were female (67%), almost half were aged between 45 and 65. 67% had attended  
255 at least elementary school and most (41%) were without formal employment (unemployed  
256 and housewives).

257 Table 3: **Respondents' general characteristics**

| Variable              | Number (%) |
|-----------------------|------------|
| <b>Gender</b>         |            |
| Male                  | 9 (33)     |
| Female                | 18 (67)    |
| <b>Age</b>            |            |
| <45                   | 6 (22)     |
| 45 – 65 years         | 12 (45)    |
| >65                   | 9 (33)     |
| <b>Marital status</b> |            |
| Single                | 1 (4)      |
| Married               | 18 (66)    |
| Widowed               | 8 (30)     |
| <b>Education</b>      |            |
| No education          | 9 (33)     |
| Primary               | 5 (19)     |
| Secondary             | 12 (44)    |
| Higher/University     | 1 (4)      |

### Occupation

|                       |         |
|-----------------------|---------|
| Unemployed/housewife  | 11 (41) |
| Retailer/Seamstress   | 4 (15)  |
| Farmer/Breeder        | 9 (33)  |
| Civil servant/teacher | 3 (11)  |

---

258

## 259 2. Participation & Empowerment in the BPS model

### 260 2.1. Autonomy

261 Patients recognize their responsibility in maintaining their health, by following the instructions  
262 of their caregivers, particularly when it comes to self-managing treatments such as insulin.

263 *“... everything depends on my behavior, I'm called upon to follow instructions, instructions: for*  
264 *example, it's myself who's called upon to inject myself with insulin, after the caregiver's*  
265 *explanations.” (Patient Bideka 5)*

266 Some also say that they feel considered, and see that there is good interaction between them  
267 and the providers, who see them as partners. This motivates them and reassures them about  
268 the difficulties they personally face. *“We talk to the nurses, we tell them about our worries,*  
269 *our problems and everything we'd like... they also take them into consideration and help us...”.*  
270 *(Patient Lumu 5)*

271 Others, on the other hand, find that this consideration is not noticeable among certain  
272 providers who display a certain negligence towards them, which frustrates patients.

273 *“Only one thing that bothers us is the lack of the Head Nurse involvement in our activities like*  
274 *other caregivers do. We're even beginning to think that he's discrediting us” (Patient*  
275 *Kabushwa 4).*

### 276 2.2. Making choice

277 In their care, patients are actively involved in choosing treatments in collaboration with  
278 providers. They discuss treatment options, and caregivers help them understand the best  
279 options based on test results and their individual needs, as explained by one interviewee, who  
280 is a caregiver and part of the club:

281 *“... Besides, I'm in charge of it as a caregiver, while being part of the patients. We discuss how*  
282 *to deal with each case, and I guide them... we start with the teachings and then various*  
283 *examinations. I explain things to them clearly and help them to adopt the treatment that suits*  
284 *them, and it's according to the results of the examinations that we give them medication.”*  
285 *(Patient Kabushwa 1)*

286 *“Your state of health itself will define the treatment to be followed (insulin or tablets). But they*  
287 *give us clear explanations about the medicines they recommend, tell us why it's the best*  
288 *option, until we understand.” (Patient Birava 5)*

### 289 3. Involvement & acceptance

#### 290 3.1. Involvement in health policy

291 Most of those surveyed had a positive perception of the relationship between patients and  
292 care providers at the facility level. Patients thus participate autonomously in decision-making  
293 about the care that affects their lives, taking into account the treatment options available.

294 *“They don't need to impose anything on me because I know that situations differ, that*  
295 *sometimes I have to be hospitalized and take insulin and other times it's just tablets; however,*  
296 *the nurse can suggest insulin but with the effects it has on us (asthenia and intense hunger), I*  
297 *suggest that they give me tablets and the advice that follows... They accept and tell me anyway*  
298 *that the best thing was insulin... ”. (Patient Bideka 1)*

299 From the advice and teachings receive from healthcare providers, they come to be aware of  
300 and accept their health condition, and this enables them to be psychologically stable.

301 *“It's just a matter of becoming aware of and accepting the illness, telling yourself that it's an*  
302 *illness like any other and respecting the instructions, advice of the caregiver.” (Patient Lumu*  
303 *1)*

304 Family and entourage, including support groups, play a crucial role in offering encouragement  
305 and advice, thus reinforcing BPS care: *“My wife accompanies me in my illness and always*  
306 *encourages me to go to the health center, even if it's just a simple malaria. She's too involved...*  
307 *We also talk to my family about my state of health, and even with some of my neighbors; and*  
308 *they also give me advice, if possible” (Patient Bideka 1).*

309 The extent to which clubs are involved in decision-making varies from place to place. In some  
310 HAs, respondents report that the leaders of their support groups (the clubs) are involved in  
311 planning at the HC level, where the various health activities are discussed with the different  
312 stakeholders. At their club meetings, they discuss the activities that concern them and whose  
313 implementation they must monitor.

314 *“There's the president, and those who come after him who discuss with Head Nurse about our*  
315 *care. And in our meetings, the president shows us, for example, the tokens that the Head Nurse*  
316 *gave him in the HC meeting, which will be used to send patients for treatment” (Patient Bideka*  
317 *3).*

318 In collaboration with providers, CHWs and club presidents make home visits (VADs) to  
319 patients' households to monitor care, preventive and promotional activities as recommended  
320 by providers. Some club members are also CHWs, which further motivates their involvement,  
321 and improves interaction between them and the providers.

322 *“I myself am a CHW. We organize VADs with the Head Nurse, and often I go with our club*  
323 *president to see other members in their households, and there we talk together about their*  
324 *health. We are also informed by the nurse who is in charge of accompanying us, and we*  
325 *participate in HC activities. For example, if there's a visitor, vaccination or construction*  
326 *activities...”.* (Patient Birava 1)

327 On the other hand, other respondents expressed a lack of involvement in HC activities, apart  
328 from awareness-raising sessions by the psychosocial agent during their club meetings.

329 *“We're with the Psychosocial Agent (PSA) every time. She teaches us a lot, and participates in*  
330 *our activities. We meet with her on the 24th of every month. Apart from that, they do a lot of*  
331 *things without involving us...”* (Patient Kabushwa 3)

### 332 **3.2. Access to health services and patient support in BPS care**

333 Patients benefit from comprehensive treatments that include, in addition to medication,  
334 psychological counseling, dietary recommendations and adapted physical activities.

335 *“Respect for diet and meals, a bit of sport (walking), small jobs that can help us get a bit of*  
336 *sweat...”* (Patient Lurhala 3)

337 During consultations at health care facilities, providers and patients work together to establish  
338 a link between the current state of health and other factors such as education, employment,  
339 family problems, etc. *“ Sometimes problems arise in the family and we think, we say to  
340 ourselves such and such a child is acting badly, or this and that, and other times we'll think  
341 about it all night and in the morning the blood pressure figures go up.” (Patient Bideka 3)*

342 Patients receive a great deal of support from the social groups to which they belong. They find  
343 that these groups bring great added value to this BPS care, especially for psychological and  
344 social aspects, such as financial access to medication when needed.

345 *“... There's a change, because with our social security fund, if someone falls ill and there's no  
346 medicine, we touch it and go and buy elsewhere. This club also helps us to be close to each  
347 other. At first you may think you're the only one who's ill, but when you meet the others, it  
348 helps you psychologically; personally, I recently lost my father, and the group really helped me.  
349 We also give advice on diet, behavior...” (Patient Kabushwa 3)*

## 350 4. Developing psychosocial skills

### 351 4.1. Cognitive skills

352 Patients have acquired important skills, thanks to the education they receive in their clubs,  
353 including knowing how to decide on their treatments, according to their state of health.  
354 *“Sometimes he gives me tablets I don't like, because I don't feel good with them, the little ones,  
355 and I tell him I don't want that. If there isn't the big one there, I tell him, stay with that, I'll go  
356 and buy somewhere else...” (Patient Nyamuhinga 3)*

357 They are also able to identify the origin of the disturbance in their health, thanks to the  
358 information they receive from providers and animators in the clubs they attend, most of which  
359 is linked to family problems: *“My [blood] pressure goes up because of harmful thoughts linked  
360 to family problems, my children are delinquents...” (Patient Birava 2).*

### 361 4.2. Social skills

362 Support groups enable patients to develop social skills through regular discussion and  
363 exchange with peers and facilitators. At their club meetings, they acquire the ability to interact  
364 and discuss their health together.

365 *“... we talk to each other in clubs before the caregivers come to teach us, and we ask questions,*  
366 *or they ask us questions to see if we've understood correctly... In fact, I'm beginning to miss*  
367 *the others who are ill but hiding in the house. There's a difference between those who stay at*  
368 *home and us who come here. Those who are at home can't benefit from these teachings...”*  
369 *(Patient Nyamuhinga 2)*

### 370 4.3. Emotional skills

371 Some respondents report their experiences in regulating their emotions or managing the  
372 stress they face on a daily basis. *“My children help me to avoid stress, and if they're not around*  
373 *I distract myself with the radio and avoid noise and anything else that might disturb me...”*  
374 *(Patient Lurhala 3)*

375 The practice of promotional activities, which are carried out in the community on the  
376 recommendation of providers, is also reported, to self-regulate.

377 *“We're asked to do the sport that makes us sweat a bit, and that will help us control ourselves,*  
378 *let off steam. For example, I have a friend in MUGOGO, I wake up in the morning, take the*  
379 *road to MUGOGO and walk back.” (Patient Bideka 3)*

380 However, efforts need to be made to promote group promotional activities, including group  
381 sport or physical exercise, which is one of the weaknesses identified by respondents.

## 382 5. Respect & Information

### 383 5.1. Adapting care to individual needs

384 Patients report that the care they receive respects their needs, preferences and  
385 independence. Some even say they feel free and satisfied with the treatment they receive at  
386 HC.

387 They are cared for as a whole, physically, psychologically and socially. This last aspect is more  
388 noticeable in the community, in the support groups to which patients belong. In some  
389 facilities, the hospital psychologist is sometimes called in for the psychological aspects, in the  
390 absence of a PSA.



391 *“The providers here treat us well; they don't impose anything on us. They take the time to listen*  
392 *to us and ... take our opinions into consideration; they talk to us well, ... in addition to*  
393 *medication, they sometimes send us the psychologists who give us advice...” (Patient Lumu 2)*

## 394 5.2. Information sharing and perspective

395 Patients receive the information they need for their treatment, from providers and social  
396 groups. They discuss together, both in their groups and with caregivers and CHWs, how to live  
397 with their disease. Some even exchange experiences with other clubs, and the information  
398 they receive from these exchanges helps them to thrive.

399 *“Here recently, our club and Burhiba's club organized a meeting with an exchange of*  
400 *experience.” (Patient Lumu 2)*

401 *“...we discuss it in our club and we exchange experience, and we learn the lesson together and*  
402 *measures that help us in our lives, this information help us to live better in society.” (Patient*  
403 *Kabushwa 2)*

404 To maintain this BPS care, the respondents gave some proposals for its improvement:

- 405 - Raising awareness among providers who show indifference
- 406 - Building capacity for better care
- 407 - Improving the supply of medicines to avoid shortages.
- 408 - Increased availability of psychologists for better care, especially for the psychological  
409 aspect.
- 410 - The strengthening of social funds to support income-generating activities, contributing  
411 to greater financial autonomy for patients. *“IGAs (Income-Generating Activities) should*  
412 *be provided, which will improve the socio-economic standard of living of some patients,*  
413 *because treatment also involves diet, but some are unable to adhere to it, or don't even*  
414 *eat, and may even lose their lives. (Patient Kabushwa 5)*

415

416

## 417 Discussion

418 The results of our study show the importance of patient involvement in their care, their ability  
419 to make informed decisions, and the key role of support groups in the success of  
420 biopsychosocial management.

421 The study provided us with various factors influencing this patient involvement in this model,  
422 including the partnership relationship between providers and patients, exchanges on  
423 therapeutic possibilities and guidance for choice, teaching received from caregivers, skills  
424 development, patient empowerment in care, organizational aspects (inclusive and  
425 participatory planning, access to different health services) and community aspects (role of  
426 entourage and patient clubs). Patients proposed strategies to support the model, including  
427 the humanization of care, capacity-building for providers, psychological assistance and the  
428 implementation of activities facilitating financial autonomy.

### 429 The patient-caregiver relationship and empowerment in integrated and 430 comprehensive care

431 Positive interaction between health service providers and users generates a feeling of  
432 consideration and motivation to become more involved in care, as the results of our study  
433 show. They also declare that the care offered to them is comprehensive, tailored to their  
434 needs, desires and independence, and testify to a sense of satisfaction with the treatment  
435 they receive. An analysis of the expected and perceived satisfaction of users of VVS (victims  
436 of sexual violence) services for holistic care at Panzi Hospital, eastern DRC, identified various  
437 factors influencing satisfaction, depending on the organizational framework of the services  
438 provided as well as the social environment of the beneficiaries (22).

439 Others, on the other hand, have found that some providers are indifferent to their gaze,  
440 without consideration, and display a certain neglect towards them, leading to frustration on  
441 their part. Lack of empathy and compassion towards the patient can have psychological  
442 repercussions, leading to feelings of dissatisfaction, rejection and lack of confidence, all of  
443 which have a negative impact on therapeutic success. This should be taken into account in the  
444 biopsychosocial model of care (42,43).

445 The empowerment of care is an essential factor to consider in the BPS model of care. We have  
446 seen from our respondents that the patient has an important role to play in BS care, as the  
447 person responsible for his or her own health. He or she is simply called upon to follow the  
448 instructions and advice provided by providers to maintain his or her health.

449 Other elements that reinforce this provider-recipient relationship and empowerment are the  
450 discussions that take place either during the consultation or during the educational sessions,  
451 in relation to the various therapeutic possibilities and various other advice on how to live with  
452 their illness, as mentioned by our respondents. They also receive guidance in choosing the  
453 option that seems best, taking into account their needs. These educational sessions also  
454 enable them to develop their knowledge and acquire skills. In this context, we find the  
455 elements of health literacy, notably functional knowledge (how to inject insulin, for example),  
456 interactive knowledge (the discussions they have in their meetings) and critical knowledge  
457 (discussions on the different therapeutic possibilities and making the choice), as well as  
458 elements of psychosocial skills development (the ability to identify, for example, the origin of  
459 the disturbance in their state of health, experience in regulating their emotions or stress  
460 management through preventive and promotional activities, including sport...). Other authors  
461 have tried to analyze these elements of literacy and psychosocial skills in the patient care  
462 process (44–46).

463 We also felt that efforts needed to be made to strengthen group promotional activities,  
464 including group physical exercise, which was one of the weaknesses identified by our  
465 respondents. These types of exercise can be carried out under the supervision of providers.  
466 The experience of the Centres de Santé Médicalisés Urbains (CSMU) in the east of the DRC is  
467 an example of successful care and user satisfaction, thanks to the availability of a  
468 physiotherapy service to promote these physical activities under medical supervision (47).

#### 469 **Participation/Engagement of patients in health policy as partners in BPS care**

470 Partnership in care means involving patients in the definition of policies concerning their  
471 health, involving them in planning and decision-making, in order to reassure themselves that  
472 their needs are being taken into account, that they are being treated with dignity, and thus  
473 contribute to improving the quality of care. Most of the people we interviewed said that  
474 providers see them as partners, which reassures them of the difficulties they face personally.

475 This partnership is also felt by the entourage and support groups (patient clubs) who are  
476 involved in biopsychosocial care, through the accompaniment and discussions they have with  
477 caregivers and the follow-up in care. Club leaders are also involved in planning the various  
478 health-related activities at HC level with the various other stakeholders, and discuss with their  
479 members the activities that concern them and whose implementation they must monitor.

480 This partnership is one of the key factors in user satisfaction, as revealed by Heberer M et al.  
481 (48). Pomey M-P et al. show us in their study on the contribution of patients to improving the  
482 quality of healthcare services, the advantage of involving patients in decision-making, the care  
483 process and the implementation of improvement actions, by drawing on their own experience  
484 (10). Other countries have set up patient partner organizations to help improve care and  
485 achieve better health outcomes (49). Abelson J et al., through a survey organized in Canada,  
486 in trying to understand this partnership, were able to identify factors that facilitate or hinder  
487 it, and gave guidelines for the success of this collaboration (50).

#### 488 [Access to information and other care services and support for the BPS model](#)

489 In terms of access to information, we noted among our respondents that patients receive it in  
490 relation to their treatment, within the clubs to which they belong (discussion sessions with  
491 facilitators and caregivers). In these patient clubs, they find the time to share their  
492 experiences, give each other advice, and the providers also come to hold educational themes  
493 on the daily management of the state of health, hygiene, adherence to diet, preventive and  
494 promotional measures, how to live with one's illness... Patients receive a great deal of support  
495 from the groups or social networks to which they belong. They find that these groups add a  
496 great deal of value to their BPS management, especially in terms of the psychological and  
497 social aspects (notably moral support, improved interaction between patients and providers,  
498 mutual social assistance...). And all this helps them to flourish in society. These benefits of  
499 support systems have also been cited by other authors (33,51,52).

500 The role of community representatives, including CHWs, is also mentioned by respondents,  
501 especially their involvement in VADs, in support of providers, during which exchanges on  
502 health status and monitoring of preventive and promotional activities take place. Some  
503 authors have demonstrated this role in the management of certain pathologies, notably  
504 hypertension and user satisfaction, maternal and neonatal health... (53,54).

505 However, we did note the desire to see BPS care maintained, through a number of proposals,  
506 including raising the awareness and capacity of certain providers, particularly in the area of  
507 humanizing care, and strengthening the social fund to implement a number of income-  
508 generating activities with a view to financial autonomy. The humanization of care and  
509 activities to support financial autonomy have proved their worth in improving health services  
510 and the quality of care (55–58).

## 511 **Study limits and operational implications**

512 Our study was limited to only one category of patients, presenting complex situations and  
513 belonging to the patients' clubs for at least one year prior to the study. The inclusion of other  
514 patients, also those not attending these clubs, would provide additional information, within  
515 the framework of this biopsychosocial management. We collected patients' opinions, without  
516 including observation of medical practice with providers, or participation in these support  
517 group activities to reassure ourselves of real involvement and interaction in this care process.  
518 As noted in the study, the respondents' level of education could influence the results,  
519 especially for the uneducated. The selection criteria mentioned above help to minimize this  
520 bias: respondents who have been attending the clubs for at least a year, and who have  
521 participated in several educational sessions, appear to be more predisposed to becoming  
522 aware of their health status and changing behavior for their well-being.

523 For respondents who spoke the local language (“Shi”), we used a single interpreter, as this  
524 could reduce the comprehensibility or accurate translation of our respondents' statements,  
525 and thus influence the interpretation of the results. Given the size of our sample, the  
526 information may not have been diversified. Longitudinal studies, including more people,  
527 would enable us to follow the evolution of empowerment and measure this involvement of  
528 patients in the BPS model.

529 The results of our study should encourage health systems to define and adopt policies for  
530 involving patients in the provision of care, to promote practices that strengthen the patient-  
531 provider partnership, and specifically, in the context of the DRC, a country with limited  
532 resources, capitalize on them to improve access to care by strengthening patients' financial  
533 autonomy.

## 534 Conclusions

535 This study of patients with complex situations in three health zones in South Kivu, DRC, on  
536 their involvement in the BPS model of integrated care in primary health services, allowed us  
537 to describe this involvement in the choice of their health policy, their responsibility in holistic  
538 care and their ability to support this BPS model.

539 The results of the study identified a number of factors that influence patient involvement in  
540 this model, and which should be taken into account in policy-making and the process of  
541 integration of biopsychosocial care. Strategies discussed to support the model, including  
542 increasing awareness of humanizing care, improving the availability of resources, and  
543 increasing financial self-sufficiency, improve the quality of care and access to quality health  
544 services. This research should be extended to other health situations, both chronic and acute,  
545 in the PCC approach.

## 546 Abbreviations

547 BPS: Biopsychosocial; CHW: Community Health Workers; DRC: Democratic Republic of the  
548 Congo; HA: Health Area; HC: Health Center; HD: Health District; IGA: Income-Generating  
549 Activity; OAC (Organisation à Assise Communautaire): Community Based Organization; PCC:  
550 Person-Centered Care; PSA: Psychosocial Agent; VAD (Visite à Domicile): Home Visit.

551

552

553

554

555

556

557

558

## 559 Acknowledgements

560 The authors thank all survey respondents for their participation in the study as well as South  
561 Kivu Provincial Health Division for facilitating the descent into HDs for data collection.

## 562 References

- 563 1. World Health Organization (WHO). Exploring Patient Participation in Reducing Health-  
564 Care-Related Safety Risks [Internet]. WHO: Geneva. 2013. 1–190 p. Available from:  
565 [http://scholar.google.com/scholar?hl=en&btnG=Search&q=intitle:Exploring+patient+](http://scholar.google.com/scholar?hl=en&btnG=Search&q=intitle:Exploring+patient+participation+in+reducing+health-care-related+safety+risks#0)  
566 [participation+in+reducing+health-care-related+safety+risks#0](http://scholar.google.com/scholar?hl=en&btnG=Search&q=intitle:Exploring+patient+participation+in+reducing+health-care-related+safety+risks#0)
- 567 2. Bombard Y, Baker GR, Orlando E, Fancott C, Bhatia P, Casalino S, et al. Engaging  
568 patients to improve quality of care: A systematic review. *Implement Sci.* 2018;13(1):1–  
569 22.
- 570 3. Castro EM, Van Regenmortel T, Vanhaecht K, Sermeus W, Van Hecke A. Patient  
571 empowerment, patient participation and patient-centeredness in hospital care: A  
572 concept analysis based on a literature review. *Patient Educ Couns.* 2016;99(12):1923–  
573 39.
- 574 4. Haywood K, Marshall S, Fitzpatrick R. Patient participation in the consultation process:  
575 a structured review of intervention strategies. *Patient Educ Couns.* 2006;63(1–2):12–  
576 23.
- 577 5. Say R, Murtagh M, Thomson R. Patients’ preference for involvement in medical  
578 decision making: A narrative review. *Patient Educ Couns.* 2006;60(2):102–14.
- 579 6. Colombo C, Moja L, Gonzalez-Lorenzo M, Liberati A, Mosconi P. Patient  
580 empowerment as a component of health system reforms: Rights, benefits and vested  
581 interests. *Intern Emerg Med.* 2012;7(2):183–7.
- 582 7. Dent M, Pahor M. Patient involvement in Europe – a comparative framework. *J Health*  
583 *Organ Manag.* 2015;29(5):546–55.
- 584 8. Baker GR, Fancott C, Judd M, O’Connor P. Expanding patient engagement in quality  
585 improvement and health system redesign: three Canadian case studies. *Healthc*

- 586 Manag Forum. 2016;29(5):176–82.
- 587 9. Kuipers SJ, Cramm JM, Nieboer AP. The importance of patient-centered care and co-  
588 creation of care for satisfaction with care and physical and social well-being of  
589 patients with multi-morbidity in the primary care setting. BMC Health Serv Res.  
590 2019;19(1):1–9.
- 591 10. Pomey M-P, Hihat H, Khalifa M, Lebel P, Néron A, Dumez V. Patient partnership in  
592 quality improvement of healthcare services: Patients’ inputs and challenges faced.  
593 Patient Exp J. 2015;2(1):29–42.
- 594 11. De las Cuevas C, Peñate W, de Rivera L. To what extent is treatment adherence of  
595 psychiatric patients influenced by their participation in shared decision making?  
596 Patient Prefer Adherence [Internet]. 2014;8:1547–53. Available from:  
597 <https://doi.org/10.2147/PPA.S73029>
- 598 12. Karazivan P, Dumez V, Flora L, Pomey MP, Del Grande C, Ghadiri DP, et al. The patient-  
599 as-partner approach in health care: A conceptual framework for a necessary  
600 transition. Acad Med. 2015;90(4):437–41.
- 601 13. Ankomah SE, Fusheini A, Ballard C, Kumah E, Gurung G, Derrett S. Patient-Public  
602 Engagement for health system improvement in Sub-Saharan Africa: A systematic  
603 scoping review. BMC Health Serv Res. 2021;21(1047):1–16.
- 604 14. Norman I. Blind Trust in the Care-Giver: Is Paternalism Essential to the Health-Seeking  
605 Behavior of Patients in Sub-Saharan Africa? Adv Appl Sociol. 2015;05(02):94–104.
- 606 15. Duffy M, Madevu-Matson C, Posner JE, Zwick H, Sharer M, Powell AM. Systematic  
607 review: Development of a person-centered care framework within the context of HIV  
608 treatment settings in sub-Saharan Africa. Trop Med Int Heal. 2022;27:479–93.
- 609 16. Hack SM, Muralidharan A, Brown CH, Lucksted AA, Patterson J. Provider and  
610 Consumer Behaviors and their Interaction for Measuring Person-Centered Care. Int J  
611 Pers Cent Med [Internet]. 2017;7(1):14–20. Available from:  
612 <http://www.ncbi.nlm.nih.gov/pubmed/31452868>  
613 <http://www.pubmedcentral.nih.gov/articlerender.fcgi?artid=PMC6709667>



- 614 17. Asare M, Danquah SA. The African Belief System and the Patient's Choice of  
615 Treatment from Existing Health Models-the Case of Ghana. Vol. 03, Acta  
616 Psychopathologica. 2017. p. 49.
- 617 18. Mogueo A, Defo BK. Patients' and family caregivers' experiences and perceptions  
618 about factors hampering or facilitating patient empowerment for self-management of  
619 hypertension and diabetes in Cameroon. BMC Health Serv Res [Internet].  
620 2022;22(1):1–17. Available from: <https://doi.org/10.1186/s12913-022-08750-4>
- 621 19. Mogueo A, Defo BK, Mbanya JC. Healthcare providers' and policymakers' experiences  
622 and perspectives on barriers and facilitators to chronic disease self-management for  
623 people living with hypertension and diabetes in Cameroon. BMC Prim Care [Internet].  
624 2022;23(1):1–19. Available from: <https://doi.org/10.1186/s12875-022-01892-8>
- 625 20. Tshamba HM, Kes AM, Kyalubile NM, Kashala M, Tshisand K, Nyiongonyi AN, et al.  
626 Patient satisfaction, one of the levers for the health services performance:  
627 Contribution to scientific evidence, Lubumbashi, Democratic Republic of Congo. Int J  
628 Multidiscip Curr Res. 2018;6(5):1053–60.
- 629 21. Criel B, Waelkens MP, Nappa FK, Coppieters Y, Laokri S. Can mutual health  
630 organisations influence the quality and the affordability of healthcare provision? The  
631 case of the Democratic Republic of Congo. PLoS One [Internet]. 2020;15(4):1–21.  
632 Available from: <http://dx.doi.org/10.1371/journal.pone.0231660>
- 633 22. Mugisho GM, Maroyi R, Nabami S, Kasherwa AC, Bitenga A, Mukwege D. Sexual and  
634 gender-based violence victims' satisfaction of the support services through the holistic  
635 model of care in the Democratic Republic of Congo. Discov Soc Sci Heal [Internet].  
636 2022;2(1):1–14. Available from: <https://doi.org/10.1007/s44155-022-00025-x>
- 637 23. Kasongo B, Mukalay A, Molima C, Makali SL, Chiribagula C, Mparanyi G, et al.  
638 Community perceptions of a biopsychosocial model of integrated care in the health  
639 center: the case of 4 health districts in South Kivu, Democratic Republic of Congo.  
640 BMC Health Serv Res [Internet]. 2023;23(1):1–12. Available from:  
641 <https://doi.org/10.1186/s12913-023-10455-1>
- 642 24. Ministère de la Santé Publique. Recueil des normes de création, d'organisation et de

- 643            fonctionnement des structures de la zone de santé en République Démocratique du  
644            Congo. Kinshasa Secrétariat Général à la Santé RDC. 2019;113.
- 645    25.    Ministère de la Santé Publique. Manuel des procédures d'organisation et de  
646            fonctionnement des structures et des approches de participations communautaires.  
647            Kinshasa Secrétariat Général à la Santé RDC. 2016;64.
- 648    26.    Merriam SB. Introduction to qualitative research. Qual Res Pract examples Discuss  
649            Anal. 2002;1(1):1–17.
- 650    27.    Elliott R, Timulak L. Descriptive and interpretive approaches to qualitative research.  
651            In: A handbook of research methods for clinical and health psychology. 2005. p. 147–  
652            60.
- 653    28.    Halvorsen K, Dihle A, Hansen C, Nordhaug M, Jerpseth H, Tveiten S, et al.  
654            Empowerment in healthcare: A thematic synthesis and critical discussion of concept  
655            analyses of empowerment. Patient Educ Couns [Internet]. 2020;103(7):1263–71.  
656            Available from: <https://doi.org/10.1016/j.pec.2020.02.017>
- 657    29.    Polese F, Tartaglione AM, Cavacece Y. Patient empowerment for healthcare service  
658            quality improvements: a value co-creation view. 19th Toulon-Verona Int Conf Excell  
659            Serv. 2016;(September 2016):385–98.
- 660    30.    American Geriatrics Society Expert Panel on PCC, Brummel-Smith K, Butler D, Frieder  
661            M, Gibbs N, Henry M, et al. Person-Centered Care A Definition and Essential Elements.  
662            J Am Geriatr Soc. 2016;64(1):15–8.
- 663    31.    Janzen JM. Therapy Management: Concept, Reality, Process. Med Anthropol Q.  
664            1987;1(1):68–84.
- 665    32.    Lubega M, Ogwok J, Nabunya B, Mbalinda SN. Role of community-based health clubs  
666            in promoting patients' health education for diabetes self-care management: an  
667            interventional qualitative study in a Ugandan urban setting. BMJ Open Qual.  
668            2023;12(4):1–7.
- 669    33.    Abu Ghazaleh H, Artom M, Sturt J. A systematic review of community Leg Clubs for  
670            patients with chronic leg ulcers. Prim Health Care Res Dev. 2018;20:e65.

- 671 34. Molima CEN, Karemere H, Bisimwa G, Makali S, Mwene-Batu P, Malembaka EB, et al.  
672 Barriers and Facilitators in the Implementation of Bio-psychosocial Care at the Primary  
673 Healthcare Level in South Kivu, Democratic Republic of Congo. *African J Prim Heal*  
674 *Care Fam Med*. 2021;13(1):1–10.
- 675 35. Molima CEN, Karemere H, Makali S, Bisimwa G, Macq J. Is a bio-psychosocial approach  
676 model possible at the first level of health services in the Democratic Republic of  
677 Congo? An organizational analysis of six health centers in South Kivu. *BMC Health Serv*  
678 *Res [Internet]*. 2023;23(1):1–15. Available from: [https://doi.org/10.1186/s12913-023-](https://doi.org/10.1186/s12913-023-10216-0)  
679 [10216-0](https://doi.org/10.1186/s12913-023-10216-0)
- 680 36. De Man J, Mayega RW, Sarkar N, Waweru E, Leys M, Van Olmen J, et al. Patient-  
681 Centered Care and People-Centered Health Systems in Sub-Saharan Africa: Why So  
682 Little of Something So Badly Needed? *Int J Pers Cent Med*. 2016;6(3):162–73.
- 683 37. Moreau A, Kellou N, Supper I, Lamort-bouché M, Dupraz C, Pigache C, et al. L’  
684 approche centrée patient : un concept adapté à la prise en charge éducative du  
685 patient diabétique de type 2. *Exercer*. 2013;24(110):268–77.
- 686 38. Mead N, Bower P. Patient-centredness: A conceptual framework and review of the  
687 empirical literature. *Soc Sci Med*. 2000;51(7):1087–110.
- 688 39. Groves J. International Alliance of Patients’ Organizations perspectives on person-  
689 centered medicine. *Int J Integr Care*. 2010;10(5):27–9.
- 690 40. Armat MR, Assarroudi A, Rad M, Sharifi H, Heydari A. Inductive and deductive:  
691 Ambiguous labels in qualitative content analysis. *Qual Rep*. 2018;23(1):219–21.
- 692 41. Thomas DR. A General Inductive Approach for Analyzing Qualitative Evaluation Data.  
693 *Am J Eval*. 2006;27(2):237–46.
- 694 42. Sinclair S, Beamer K, Hack TF, McClement S, Raffin Bouchal S, Chochinov HM, et al.  
695 Sympathy, empathy, and compassion: A grounded theory study of palliative care  
696 patients’ understandings, experiences, and preferences. *Palliat Med*. 2017;31(5):437–  
697 47.
- 698 43. Baguley SI, Pavlova A, Consedine NS. More than a feeling? What does compassion in

- 699 healthcare 'look like' to patients? *Heal Expect.* 2022;25(4):1691–702.
- 700 44. Debussche X, Balcou-Debussche M. Analyse des profils de littératie en santé chez des  
701 personnes diabétiques de type 2 : la recherche ERMIES-Ethnosocio. *Sante Publique*  
702 (Paris). 2018;S1(HS1):145–56.
- 703 45. Riva S, Antonietti A, Iannello P, Pravettoni G. What are judgment skills in health  
704 literacy? A psycho-cognitive perspective of judgment and decision-making research.  
705 Patient Prefer Adherence [Internet]. 2015;9:1677–86. Available from:  
706 <https://doi.org/10.2147/PPA.S90207>
- 707 46. Rothman RL, Yin HS, Mulvaney S, Co JPT, Homer C, Lannon C. Health literacy and  
708 quality: Focus on chronic illness care and patient safety. *Pediatr Heal Lit.*  
709 2009;124(SUPPL. 3):S315–26.
- 710 47. Lambert H, Kahindo JBM. Access to care and care of diabetics in the Democratic  
711 Republic of Congo. *Sante Publique (Paris)*. 2022;34(1):61–70.
- 712 48. Heberer M, Bourke L, Wildhaber F, Sütterlin J. Partnership between patients and  
713 health care professionals is an important determinant of patient satisfaction. *Int J*  
714 *Healthc.* 2015;2(1):1–12.
- 715 49. Nickel WK, Weinberger SE, Guze PA, Patients Partnership in Healthcare Committee of  
716 the American College of Physicians . Principles for Patient and Family Partnership in  
717 Care: An American College of Physicians Position Paper. *Ann Intern Med.*  
718 2018;169(11):796–9.
- 719 50. Abelson J, Canfield C, Leslie M, Levasseur MA, Rowland P, Tripp L, et al. Understanding  
720 patient partnership in health systems: lessons from the Canadian patient partner  
721 survey. *BMJ Open.* 2022;12(e061465):1–9.
- 722 51. Upton D, Upton P, Alexander R. Contribution of the Leg Club model of care to the  
723 well-being of people living with chronic wounds. *J Wound Care.* 2015;24(9):397–405.
- 724 52. de Jager GA, Crowley T, Esterhuizen TM. Patient satisfaction and treatment adherence  
725 of stable human immunodeficiency virus-positive patients in antiretroviral adherence  
726 clubs and clinics. *African J Prim Heal Care Fam Med.* 2018;10(1):1–8.

- 727 53. Edward A, Krishnan A, ETTYANG G, Jung Y, Perry HB, Ghee AE, et al. Can people-  
728 centered community-oriented interventions improve skilled birth attendance?  
729 Evidence from a quasi-experimental study in rural communities of Cambodia, Kenya,  
730 and Zambia. *BMC Pregnancy Childbirth*. 2020;20(1):1–13.
- 731 54. Oseni TIA, Olawumi AL, Salam TO, Issa A, Abiso MA, Sanusi I, et al. The role of  
732 community health workers in the management of hypertension in Nigeria. *BMC Prim  
733 Care*. 2024;25(1):1–10.
- 734 55. Tull K. Community empowerment for improving health services. *Knowledge, evidence  
735 and learning for development (K4D)*. 2018. p. 1–21.
- 736 56. Busch IM, Moretti F, Travaini G, Wu AW, Rimondini M. Humanization of Care: Key  
737 Elements Identified by Patients, Caregivers, and Healthcare Providers. A Systematic  
738 Review. *Patient - Patient-Centered Outcomes Res [Internet]*. 2019;12(5):461–74.  
739 Available from: <https://doi.org/10.1007/s40271-019-00370-1>
- 740 57. Genberg BL, Wilson-Barthes MG, Omodi V, Hogan JW, Steingrimsson J, Wachira J, et  
741 al. Microfinance, retention in care, and mortality among patients enrolled in HIV care  
742 in East Africa. *AIDS*. 2021 Oct;35(12):1997–2005.
- 743 58. Cheraghi MA, Esmaeili M, Salsali M. Seeking Humanizing Care in Patient-Centered  
744 Care Process: A Grounded Theory Study. *Holist Nurs Pract*. 2017;31(6):359–68.

745

## 746 [Supporting information](#)

747 S1 Appendix. **Interview guide**

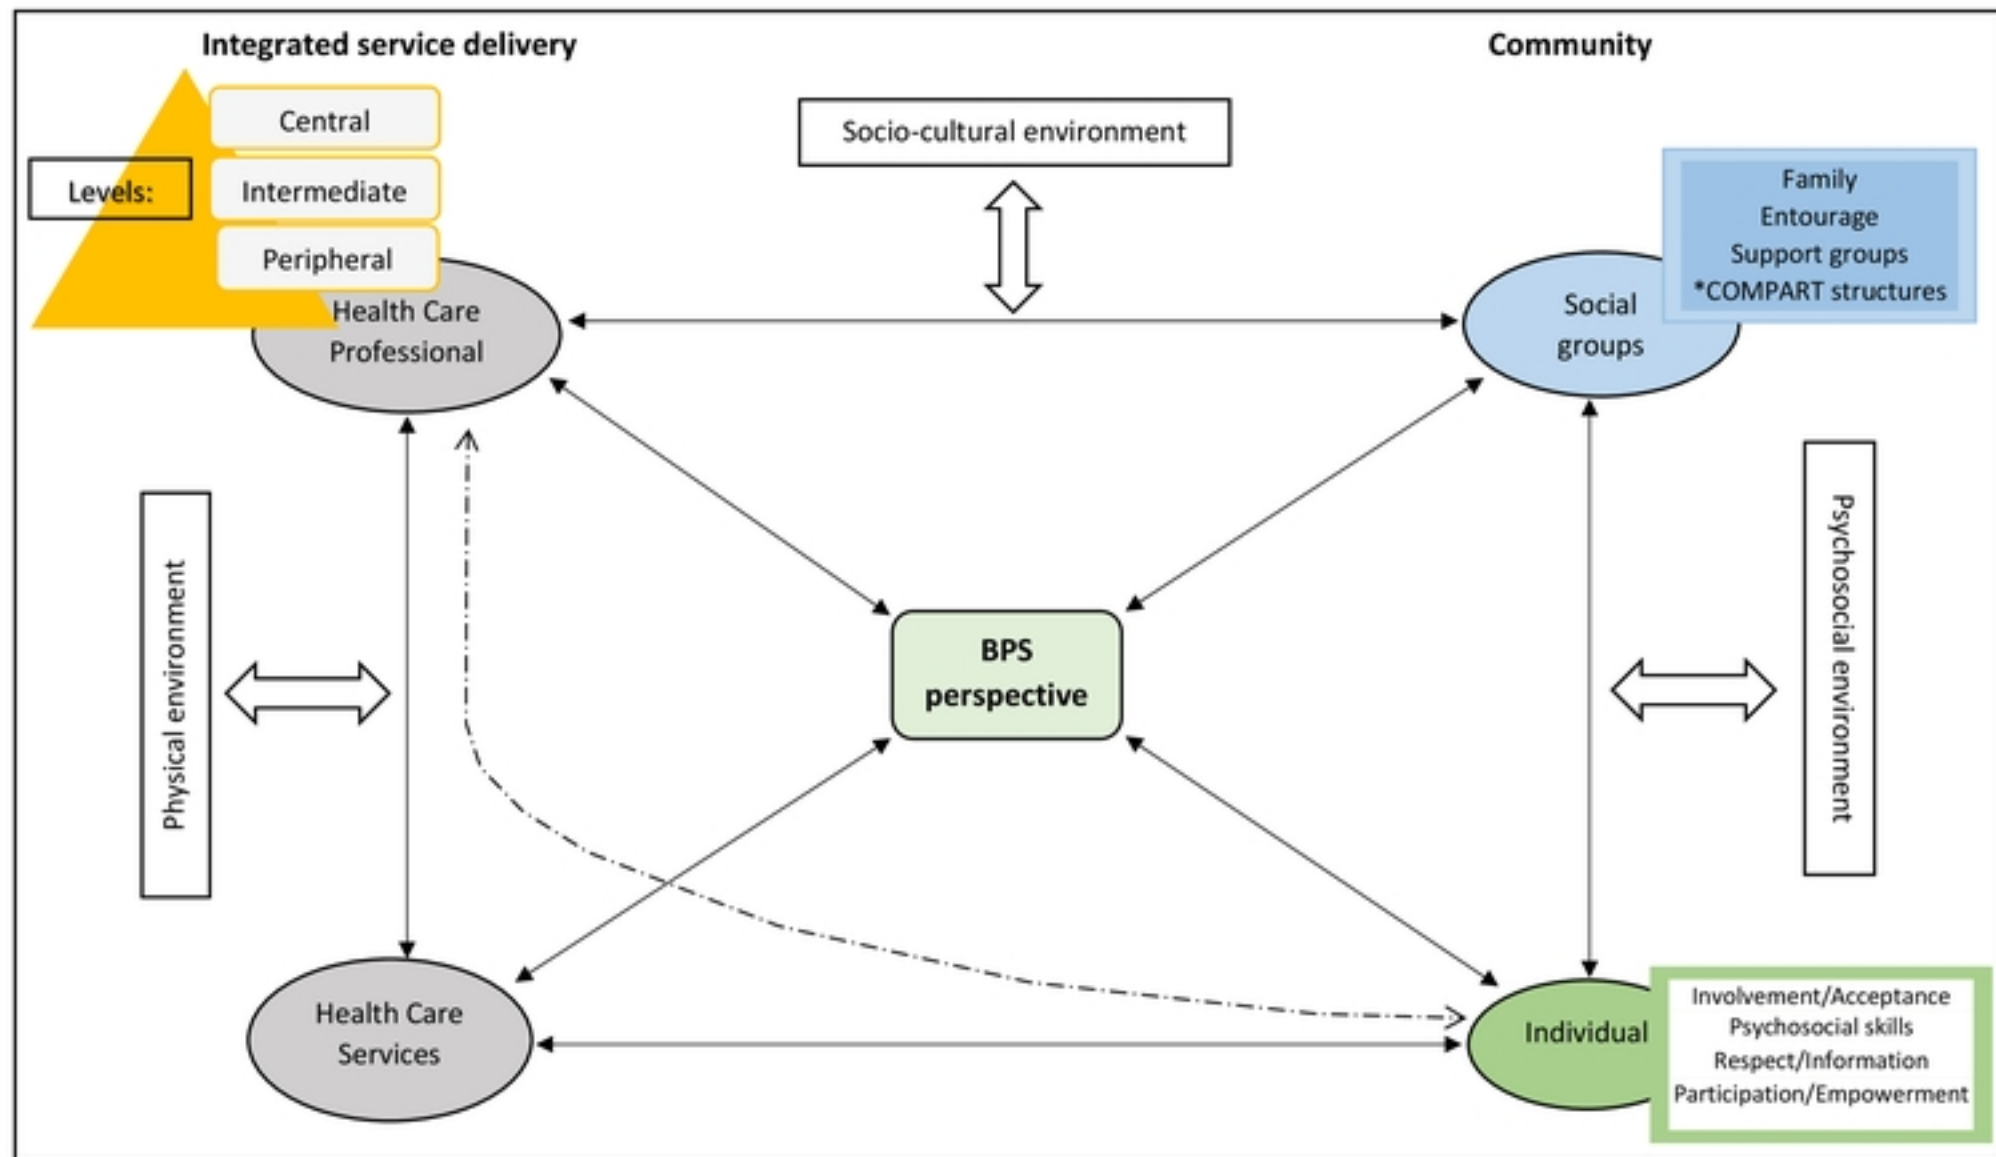

Conceptual Framework for Community Engagement in the BPS Model
